# Supplementary material for: Resident and Fellow Perspectives on Family Planning and Building During Training
Source: PubMed Central journal article supplement (PMC11358854; doi:10.1001/jamanetworkopen.2024.29345), 2024-08-28
Supplement: jamanetwopen-e2429345-s002.pdf [file jamanetwopen-e2429345-s002.pdf]

## **Data Sharing Statement**

### **Data**

**Data available:** No
